# Supplementary material for: Solution processed transition metal sulfides: application as counter electrodes in dye sensitized solar cells (DSCs)
Source: Royal Society of Chemistry journal article supplement (doi:10.1039/c1cp22817j), 2011-01-01
Supplement: c1cp22817j.pdf [file c1cp22817j.pdf]

## Solution processed transition metal sulfides: application as counter electrodes in dye sensitized solar cell (DSC)

Hemant Kumar Mulmudi,<sup>a,b</sup> Sudip Kumar Batabyal,<sup>b\*</sup> Manohar Rao,<sup>b</sup> Rajiv Ramanujam Prabhakar,<sup>b</sup> Nripan Mathews,<sup>a,b</sup> Lam Yeng Ming<sup>a,b\*</sup> and Subodh Gautam Mhaisalkar<sup>a,b</sup>

<sup>a</sup> School of Materials Science and Engineering, Nanyang Technological University, Singapore 639798.

<sup>b</sup> Energy Research Institute, Nanyang Technological University, Research Techno Plaza, Singapore 637553.

### Supporting Information:

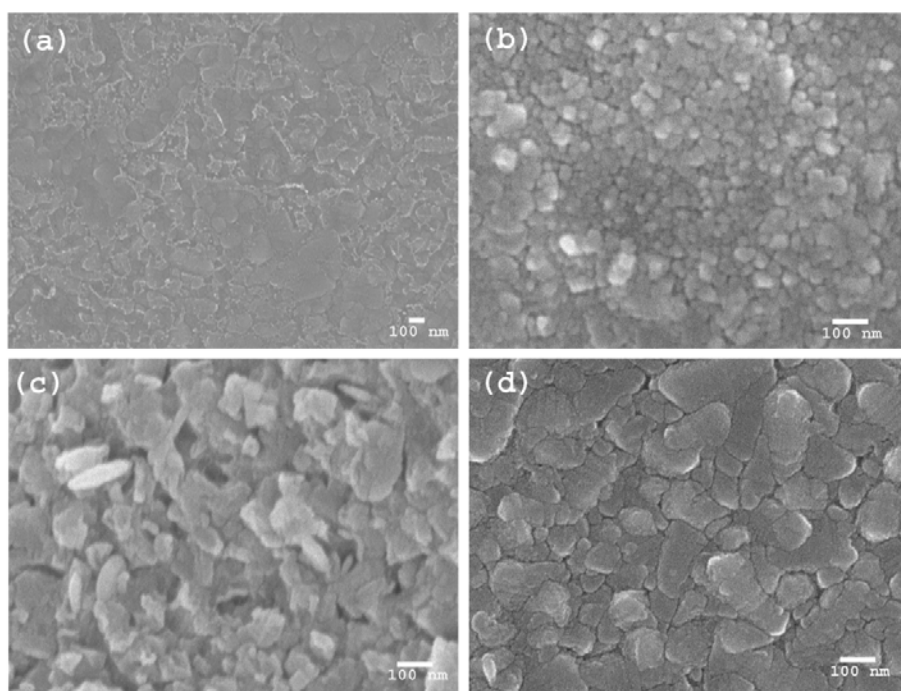

**Fig S1.** FESEM images of annealed samples on FTO (a) Pt, (b) Co<sub>8.4</sub>S<sub>8</sub>, (c) Cu<sub>1.8</sub>S and (d) Ni<sub>3</sub>S<sub>2</sub>.

### Cyclic voltammetry in polysulfide electrolyte:

To investigate the catalytic activities of the counter electrodes prepared, cyclic voltammetry (CV) (Solartron-analytical, 1470E) was performed in a three electrode system (Pt mesh, Ag/AgCl as counter and reference electrode respectively) with 1 M Na<sub>2</sub>S, 1 M S, and 0.1 M NaOH, at a scan rate of 100 mVs<sup>-1</sup>, Fig S2. The rest potentials of all the electrodes when immersed in the electrolyte were found to be  $\approx -0.7$  V which is equal to the values reported for E<sub>redox,PS</sub>. (1) The value of E<sub>redox,PS</sub> is in good agreement with

the predicted values using Nernst equation. (1, 2) All the sulfide counter electrodes show a better response than Pt in polysulfide electrolyte.

### Preparation of Pt counter electrode

Preparation of platinum counter electrode on drilled FTO was done by thermal decomposition at 400 °C of hexachloroplatinic acid (8 mM, isopropanol solution).

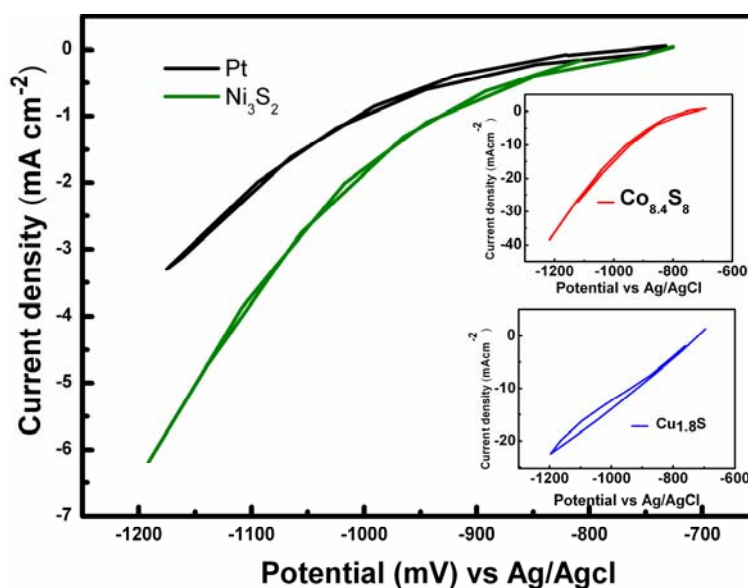

Fig S2. CVs of Pt, Co<sub>8.4</sub>S<sub>8</sub>, Ni<sub>3</sub>S<sub>2</sub> and Cu<sub>1.8</sub>S electrodes in polysulfide electrolyte (1 M Na<sub>2</sub>S, 1 M S, and 0.1 M NaOH).

### Preparation of transition metal sulfide counter electrode

The precursor solution was prepared using nickel(II) acetate tetrahydrate ( $\geq 98\%$ , Riedel-De-Haën), cobalt (II) chloride hexahydrate (reagent grade, Sigma Aldrich) and copper (II) chloride dehydrate (ACS reagent,  $\geq 99.0\%$ ) and thioacetamide (reagent grade, Sigma Aldrich). Molarity of metal salts was 0.2 mM while that of thioacetamide was 0.8 mM. 10  $\mu$ l of each precursor solution was drop casted onto drilled FTO (2.5 x 1 cm<sup>2</sup>). These samples were later annealed at 500 °C for 30 mins under Argon flow (200 sscm) to get the corresponding sulfides.

### Kelvin Probe measurements

Kelvin probe force microscopy (KPFM) was carried out on various sulfides to measure the contact potential difference of the films. The KPFM measurement was performed in a commercial Asylum Research MF3PD AFM system using commercially available platinum-coated Si cantilever. KPFM images of the sample were acquired with the tip biased as 3 V<sub>ac</sub> and lift height of 10 nm at a scan rate of 0.2 Hz, on a typical scan area of 1  $\mu$ m x 1  $\mu$ m. The contact potential difference (CPD,  $\Delta V_{sp}$ ) measured in the KPFM can be translated to the work function of the sample, where in  $\Delta V_{sp} = \Phi_t - \Phi_s$ , with  $\Phi_t$  and  $\Phi_s$

are the work functions of the tip and the sample respectively. Work functions of the samples have been calculated from the surface potential by calibrating the platinum tip cantilever on a sputtered platinum film on a glass substrate. Work function of  $5.3 \pm .05$  eV was obtained for the platinum tip. The contact potential difference for the samples was used to estimate the work function (Fig S3).

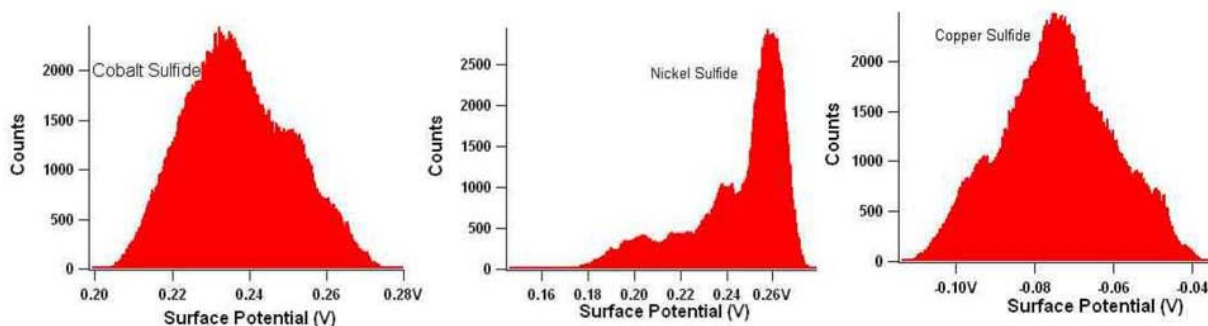

**Fig S3.** Surface potential histogram distribution for the various sulfide films deposited on glass substrate. Histogram extracted from the Kelvin images using the Igor software.

#### Cell fabrication:

A 11  $\mu\text{m}$  film consisting of transparent  $\text{TiO}_2$  nanocrystalline paste (DSL 18NR-T) was screen-printed onto FTO substrate which was pre-treated in 40 mM  $\text{TiCl}_4$  at 70°C for 30 min. Subsequently, a 5  $\mu\text{m}$  layer of Ti-Nanoxide R/SP paste (Solaronix, scattering layer) was screen printed on the same film. These electrodes were then heated at 500 °C for 15 min under programmed ramping. After annealing, the electrodes were treated again with 40 mM  $\text{TiCl}_4$  at 70°C for 30 min and sintered at 500 °C for 30 min. Once cooled, the  $\text{TiO}_2$  films were immersed overnight in a 0.3 mM acetonitrile/tert-butyl alcohol (v:v=1:1) solution of N719 dye (Solaronix). Fabrication of DSC was done by sandwiching dye soaked  $\text{TiO}_2$ /FTO electrode and platinized FTO as a counter electrode with a 25  $\mu\text{m}$  thick hot-melt spacer (Surllyn, Dupont). The Iodine/Iodide (AN 50, Solaronix) based electrolyte was introduced between the sandwiched electrodes through a hole by capillary action using a vacuum pump. The photocurrent density-photovoltage (J-V) characteristics of the PECC with an active area of 0.2826  $\text{cm}^2$  were measured under an illumination of AM 1.5 (100  $\text{mW cm}^{-2}$ ) using a solar simulator (San-EI Electric, XEC-301S) which was coupled with an Agilent semiconductor parameter analyser (4155C) for recording the J-V plot.

#### EIS of symmetric cells

Symmetric cells were fabricated by sandwiching the respective counter electrodes with a 25  $\mu\text{m}$  thick hot-melt spacer (Surllyn, Dupont). The Iodine/Iodide (AN 50, Solaronix) based electrolyte was introduced between the sandwiched electrodes through a hole by capillary action using a vacuum pump. The same cells were used to measure Tafel polarization curves using Agilent semiconductor parameter analyser (4155C) for recording the J-V plot with a step size of 10 mV.

Electrochemical impedance spectroscopic (EIS) measurements were carried out using an automated potentiostat (Solartron-analytical, 1470E) coupled with a frequency response analyzer (Solartron-analytical, 1255B). The superimposed ac signal was maintained at 10 mV while the frequency was scanned from 100 KHz to 0.1 Hz at potentials between 0.3 V under dark conditions.

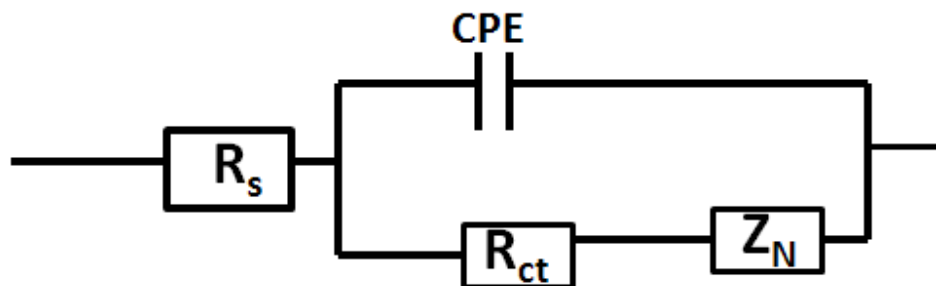

**Fig S4.** Equivalent circuit used for fitting the EIS data of the symmetric cells.  $R_s$  is the series resistance, CPE is the constant phase element,  $R_{ct}$  is the charge transfer resistance and  $Z_N$  is the Nernst diffusion impedance.

- (1) Hodes, G.; Manassen, J.; David, C. *Journal of The Electrochemical Society*. **1980**, *127*, 544.
- (2) Esposito, D. V.; Dobson, K. D.; McCandless, B. E.; Birkmire, R. W.; Chen, J. G. *Journal of The Electrochemical Society*. **2009**, *156*, B962.
